# Supplementary material for: Multifunctional supported bimetallic catalysts for a cascade reaction with hydrogen auto transfer: synthesis of 4-phenylbutan-2-ones from 4-methoxybenzyl alcohols
Source: Royal Society of Chemistry journal article supplement (doi:10.1039/c7cy00184c), 2017-01-01
Supplement: c7cy00184c1.pdf [file c7cy00184c1.pdf]

## Supporting Information

### **Multifunctional supported bimetallic catalysts for a cascade reaction with hydrogen auto transfer: synthesis of 4-phenylbutan-2-ones from 4-methoxybenzyl alcohols**

Moataz Morad,<sup>a,b</sup> Ewa Nowicka,<sup>a</sup> Mark Douthwaite,<sup>a</sup> Sarwat Iqbal,<sup>a</sup> Peter Miedziak,<sup>a</sup> Jennifer K. Edwards,<sup>a</sup> Gemma L. Brett,<sup>a</sup> Qian He,<sup>a</sup> David Morgan,<sup>a</sup> Hamed Alshammari,<sup>a,c</sup> Donald Bethell,<sup>a</sup> David W. Knight,<sup>a</sup> Meenakshisundaram Sankar<sup>a\*</sup> and Graham J. Hutchings<sup>a\*\*</sup>

<sup>a</sup>*Cardiff Catalysis Institute, School of Chemistry, Cardiff University, CF10 3AT Cardiff, United Kingdom.*

<sup>b</sup>*Chemistry Department Faculty of Science, Umm al-qura University, PO Box 21955, 9264 Makkah, Saudi Arabia.*

<sup>c</sup>*Chemistry Department, Faculty of Science, Ha'il University, P. Box 2440, 81451 Ha'il, Saudi Arabia.*

*\* Dr. Meenakshisundaram Sankar, Cardiff Catalysis Institute, School of Chemistry, Cardiff University, Cardiff, CF10 3AT (UK), Fax: (+44) 2920-874-030, E-mail: [sankar@cardiff.ac.uk](mailto:sankar@cardiff.ac.uk).*

*\*\* Prof Graham J. Hutchings, Cardiff Catalysis Institute, School of Chemistry, Cardiff University, Cardiff, CF10 3AT (UK), Fax: (+44) 2920-874-030, E-mail: [hutch@cardiff.ac.uk](mailto:hutch@cardiff.ac.uk)*

**Table S1.** Synthesis of 4-(4-methoxyphenyl)but-3-ene-2-one (**3**) from 4-methoxybenzaldehyde (**2**) and acetone using different metal oxide catalysts.

| Catalyst                                  | Conversion<br>(%) | Product                         |          |
|-------------------------------------------|-------------------|---------------------------------|----------|
|                                           |                   | Selectivity<br>(%) <sup>‡</sup> |          |
|                                           |                   | <b>3</b>                        | <b>1</b> |
| No Catalyst                               | -                 | -                               | -        |
| MgO Fresh                                 | <1                | -                               | 99       |
| MgO Calcined                              | <1                | -                               | 99       |
| ZnO Fresh                                 | <1                | -                               | 99       |
| ZnO Calcined                              | <1                | -                               | 99       |
| La <sub>2</sub> O <sub>3</sub> – Fresh    | <1                | 16                              | -        |
| La <sub>2</sub> O <sub>3</sub> – Calcined | <1                | 18                              | 43       |
| Al <sub>2</sub> O <sub>3</sub> - Fresh    | 23                | 84                              | -        |
| Al <sub>2</sub> O <sub>3</sub> - Calcined | 13                | 80                              | -        |
| TiO <sub>2</sub> - Fresh                  | 20                | 98                              | -        |
| TiO <sub>2</sub> - Calcined               | 33                | 98                              | -        |

**Reaction conditions:** 4-methoxybenzaldehyde: 1.3g; acetone: 6.3g; mesitylene (internal standard): 1g; catalyst: 0.5g, T: 348K; time: 1h. [a]: Selectivity is calculated based known and identified products and we have used a normalisation method based on these products. The C balance for these reactions were calculated to be between 70-80%. Remaining products are unidentified (20-30%).

**Table S2.** *Synthesis of 4-(4-methoxyphenyl)butan-2-one (4) from 4-methoxybenzaldehyde (2) and acetone using supported metal bi-functional catalysts*

| Catalyst                              | Conv (%) | Selectivity (%) <sup>[a]</sup> |    |    |   |    |
|---------------------------------------|----------|--------------------------------|----|----|---|----|
|                                       |          | 1                              | 3  | 4  | 5 | 6  |
| 1%Pd/TiO <sub>2</sub>                 | 16       | 9                              | 21 | 68 | 1 | 0  |
| 5%Pd/TiO <sub>2</sub>                 | 100      | 1                              | 0  | 0  | 0 | 99 |
| 1%AuPd/TiO <sub>2</sub>               | 63       | 62                             | 1  | 16 | 4 | 16 |
| 1%AuPd/Al <sub>2</sub> O <sub>3</sub> | 7        | 67                             | 3  | 27 | 0 | 2  |
| 1%AuPd/MgO                            | 100      | 40                             | 0  | 58 | 2 | 0  |
| 0.5%AuPd/MgO                          | 100      | 31                             | 0  | 61 | 7 | 0  |
| 0.5%Au/MgO                            | 90       | 1                              | 98 | 1  | 0 | 0  |
| 0.5%Pd/MgO                            | 100      | 20                             | 0  | 74 | 5 | 0  |

**Reaction conditions:** 4-methoxybenzaldehyde: 1.3g; acetone: 6.3g; mesitylene (internal standard): 1g; catalyst: 0.5g, p<sub>H<sub>2</sub></sub>: 5 bar T: 348K; time: 1h. [a]: Selectivity is calculated based known and identified products and we have used a normalisation method based on these products. The C balance for these reactions were calculated to be between 70-80%. Remaining products are unidentified (20-30%).

**Table S3.** MP-AES analysis: the total metal weight loading of the fresh 1% AuPd/MgO catalyst.

| Total Metal Loading<br>(wt. %) | Metal Loading (wt. %) |      | Molar Ratio (%) |      |
|--------------------------------|-----------------------|------|-----------------|------|
|                                | Au                    | Pd   | Au              | Pd   |
| 1.12                           | 0.69                  | 0.43 | 46.4            | 53.6 |

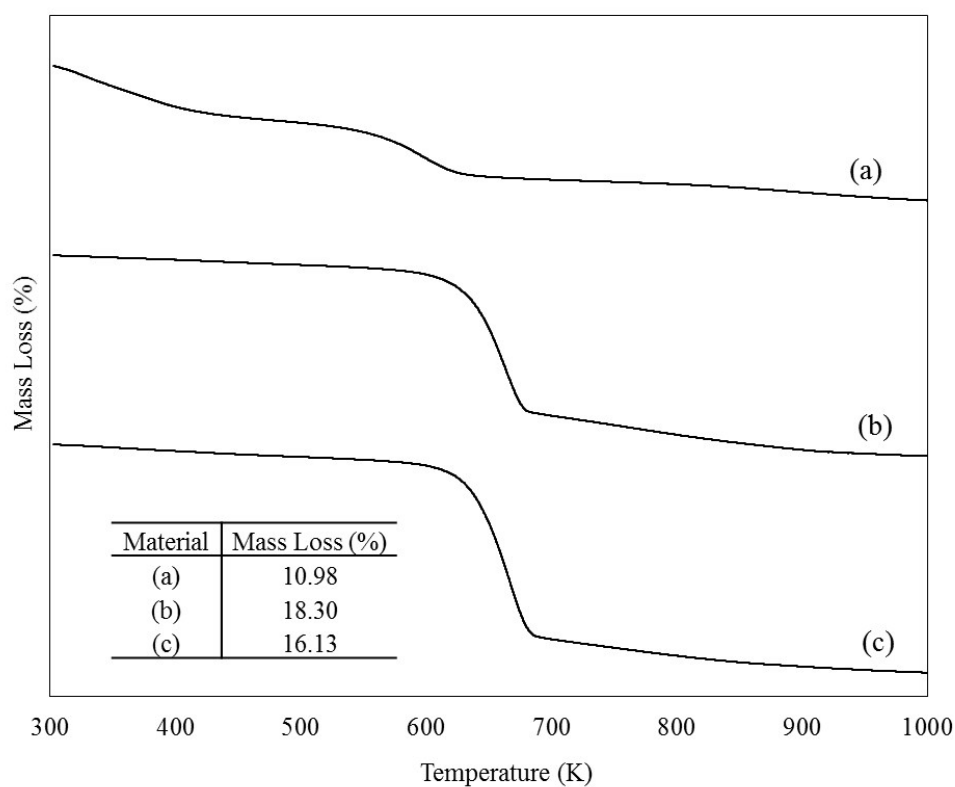

**Figure S1.** Thermogravimetric analysis traces corresponding to (a) AuPd/MgO catalyst prior to reaction, (b) the used AuPd/MgO catalyst after the reaction with 4-methoxybenzyl alcohol under  $N_2$  and (c) the used catalyst after the reaction with 4-methoxybenzyl alcohol under  $H_2$ .

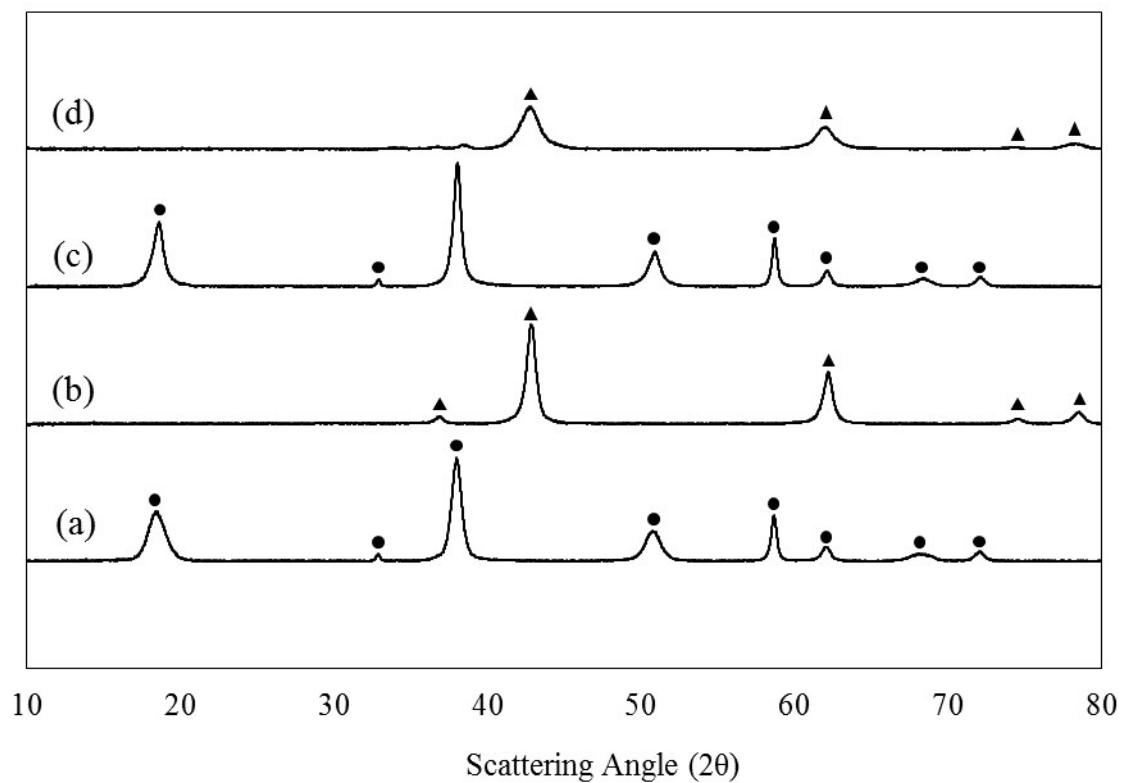

**Figure S2.** XRD data corresponding to (a) the  $\text{Mg(OH)}_2$  support, (b) the MgO support formed from the  $\text{Mg(OH)}_2$  after the first heat treatment, (c) sol-immobilised 1% AuPd/ $\text{Mg(OH)}_2$ , (d) sol immobilised 1% AuPd/MgO after heat treatment under  $\text{N}_2$ . ●:  $\text{Mg(OH)}_2$ , ▲: MgO phase.

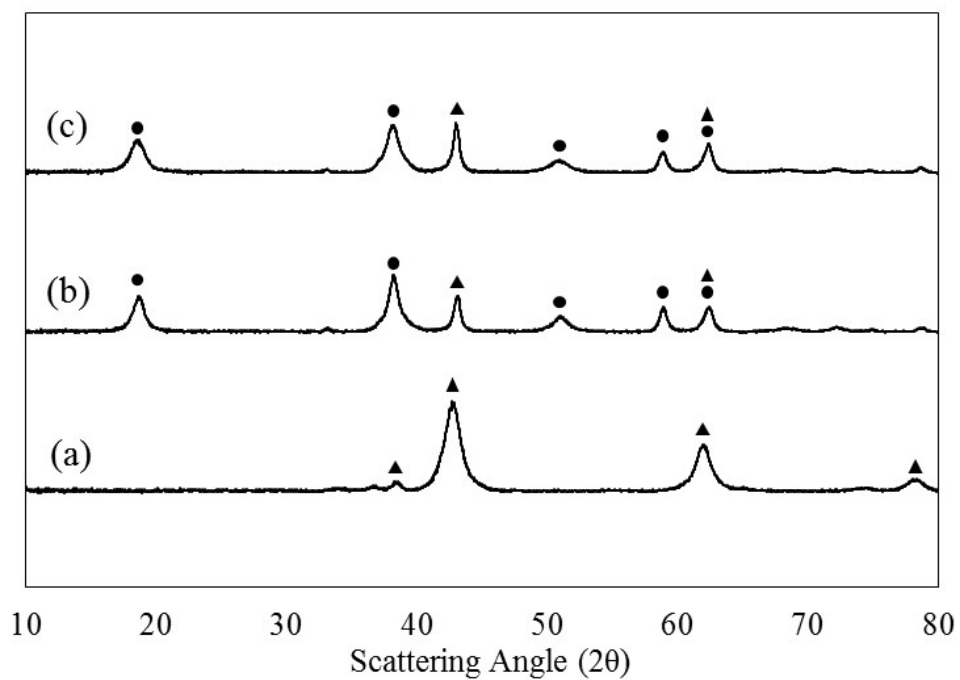

**Figure S3.** XRD data corresponding to (a) AuPd/MgO catalyst prior to reaction, (b) the used AuPd/MgO catalyst after the reaction with 4-methoxybenzyl alcohol under  $H_2$  and (c) the used catalyst after the reaction with 4-methoxybenzyl alcohol under  $N_2$ . ●:  $Mg(OH)_2$  phase; ▲: MgO phase
